# Supplementary material
Source: Springer Nature journal article supplement (https://www.springermedizin.de/resource/supplementary/12936_2010_1247_MOESM4_ESM.pdf/9549320)
Supplement: MOESM4 [file 9549320]

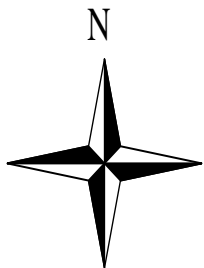

- Locations with 1998-2007 *Plasmodium falciparum* incidence and meteorological data for which the models were developed
- Administrative regions of Ethiopia

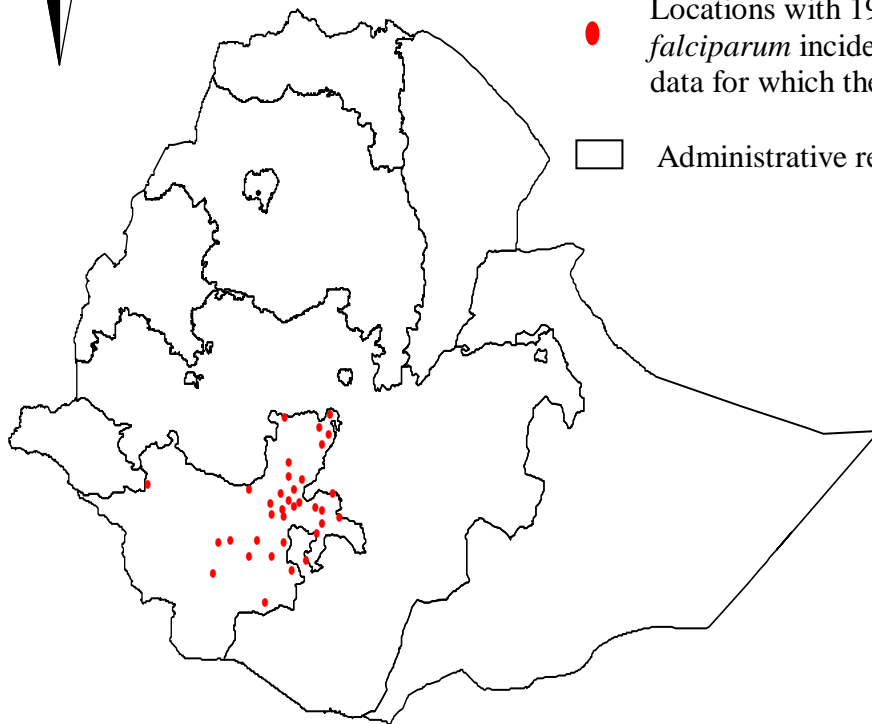

200 0 200 400 Miles

A horizontal scale bar with alternating black and white segments, marked with the numbers 200, 0, 200, and 400, followed by the word 'Miles'.
